# Supplementary material for: Facile synthesis of copper selenides with different stoichiometric compositions and their thermoelectric performance at a low temperature range
Source: Royal Society of Chemistry journal article supplement (doi:10.1039/d1ra04626h), 2021-01-01
Supplement: d1ra04626h1.pdf [file d1ra04626h1.pdf]

## Supplementary Information

### Facile synthesis of copper selenides with different stoichiometric compositions and their thermoelectric performance at low temperature range

Longbin Li<sup>a</sup>, Yifang Zhao<sup>a</sup>, Chaosheng Shi<sup>a</sup>, Wei Zeng<sup>\*a</sup>, Bing Liao<sup>b</sup>, Mingqiu Zhang<sup>c</sup>, Xiaoming Tao<sup>d</sup>

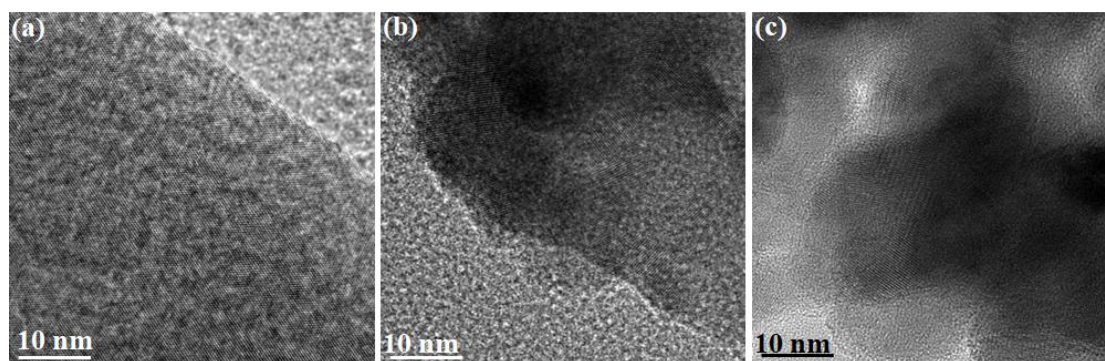

**Figure S1** HRTEM images in another resolution of (a)CuSe, (b)Cu<sub>3</sub>Se<sub>2</sub>, and (c)Cu<sub>2-x</sub>Se.

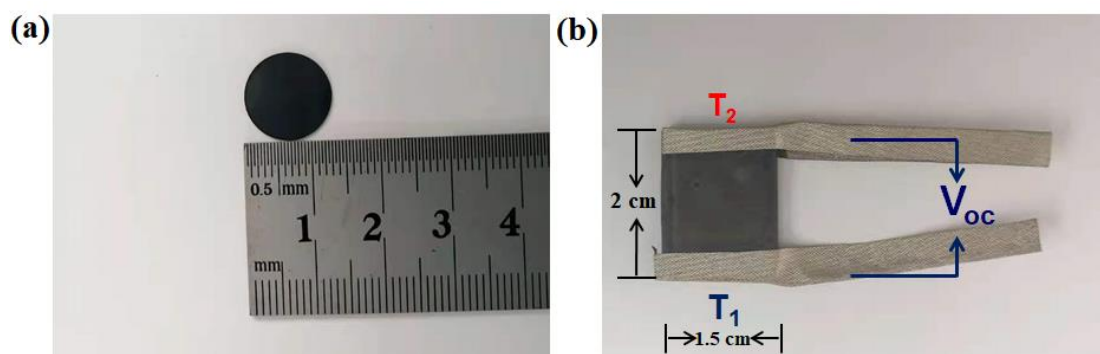

**Figure S2** Photos of the actual samples for the TE performance tests: (a)The 1.3 cm wide round disk for Seebeck coefficient, electrical conductivity and thermal conductivity measurements. (b)The 1.5 cm wide and 2.0 cm long rectangle-shaped bulk for the output voltage test. Its upper and lower sides were attached with silver tapes to assist the connection with the electrochemical workstation.

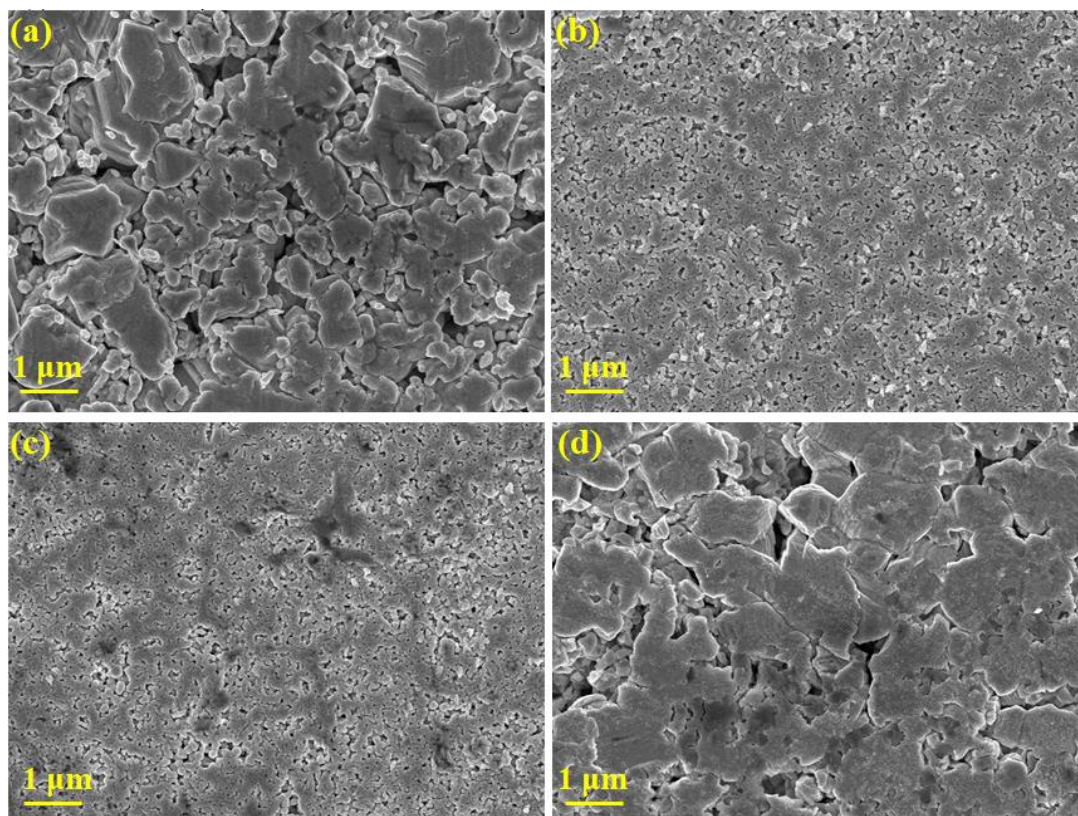

**Figure S3** SEM images of the pressed disk-shaped samples of (a)CuSe, (b)Cu<sub>3</sub>Se<sub>2</sub>, (c)Cu<sub>2-x</sub>Se, and (d) s-Cu<sub>2-x</sub>Se.

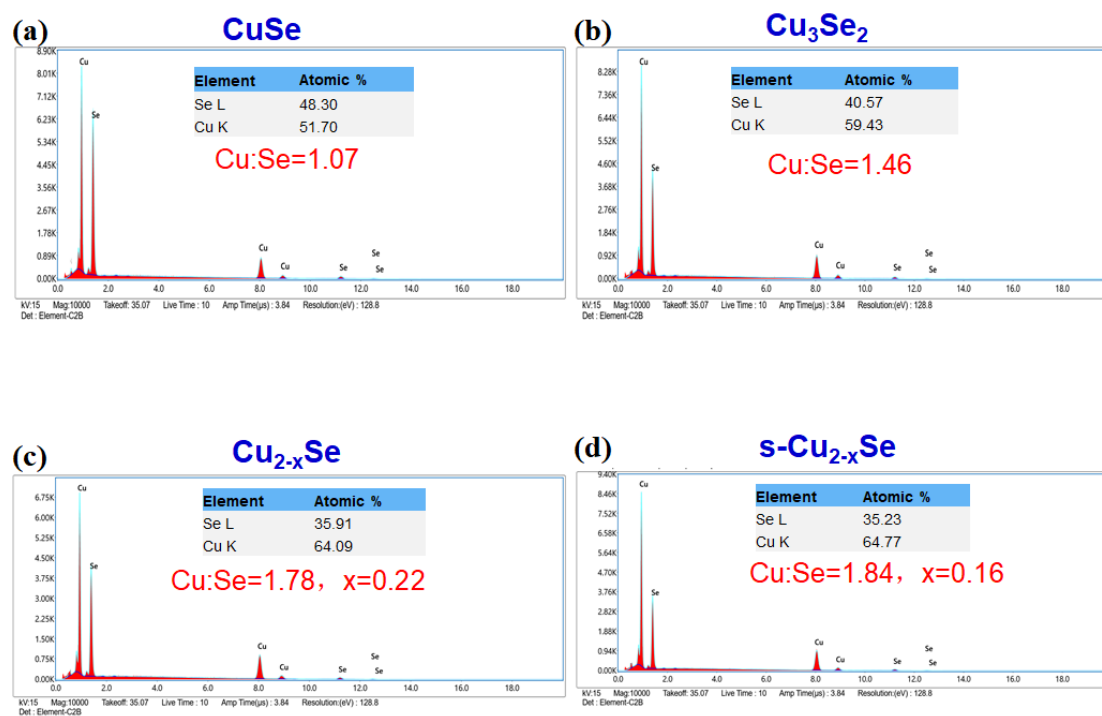

**Figure S4** EDX analysis results of the samples (a)CuSe, (b)Cu<sub>3</sub>Se<sub>2</sub>, (c)Cu<sub>2-x</sub>Se, and (d) s-Cu<sub>2-x</sub>Se.
